# Supplementary figures and images for: Evidence that small molecule enhancement of β-hexosaminidase activity corrects the behavioral phenotype in Dutch APPE693Q mice through reduction of ganglioside-bound Aβ
Source: PubMed Central journal article supplement — Mol Psychiatry. 2014 Oct 28;20(1):109–17. doi: 10.1038/mp.2014.135 (PMC5189927; doi:10.1038/mp.2014.135), 2014-10-28

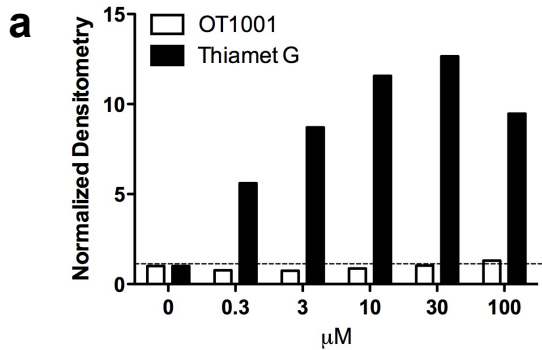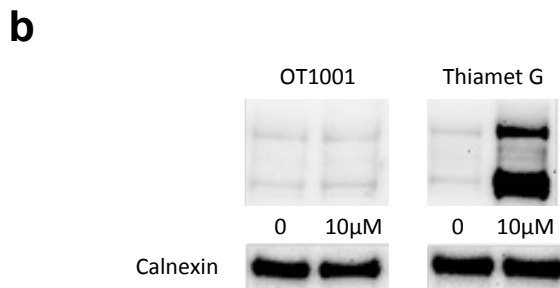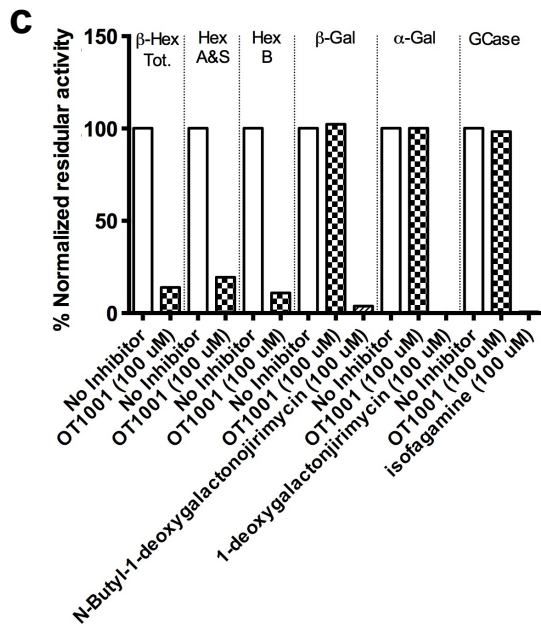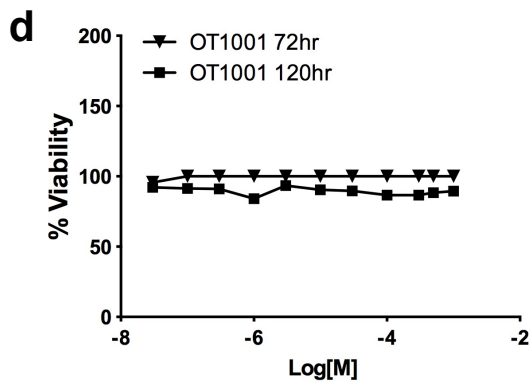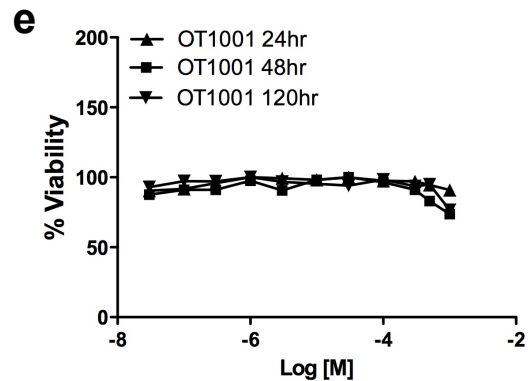

Supplement: mp2014135x2.pdf [file mp2014135x2.pdf]

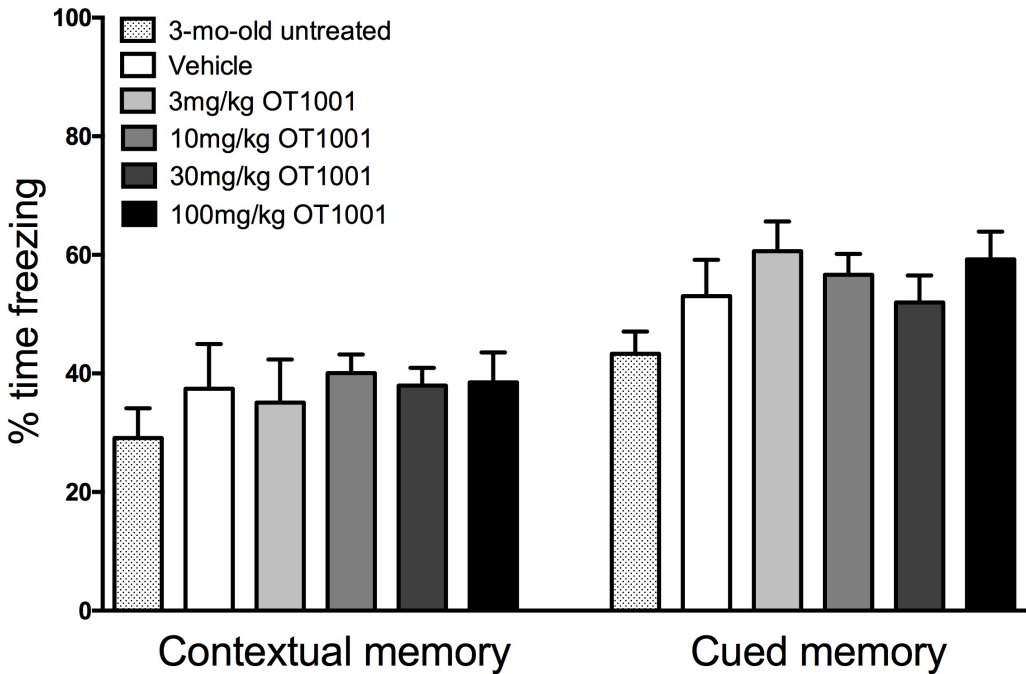

Supplement: mp2014135x3.pdf [file mp2014135x3.pdf]

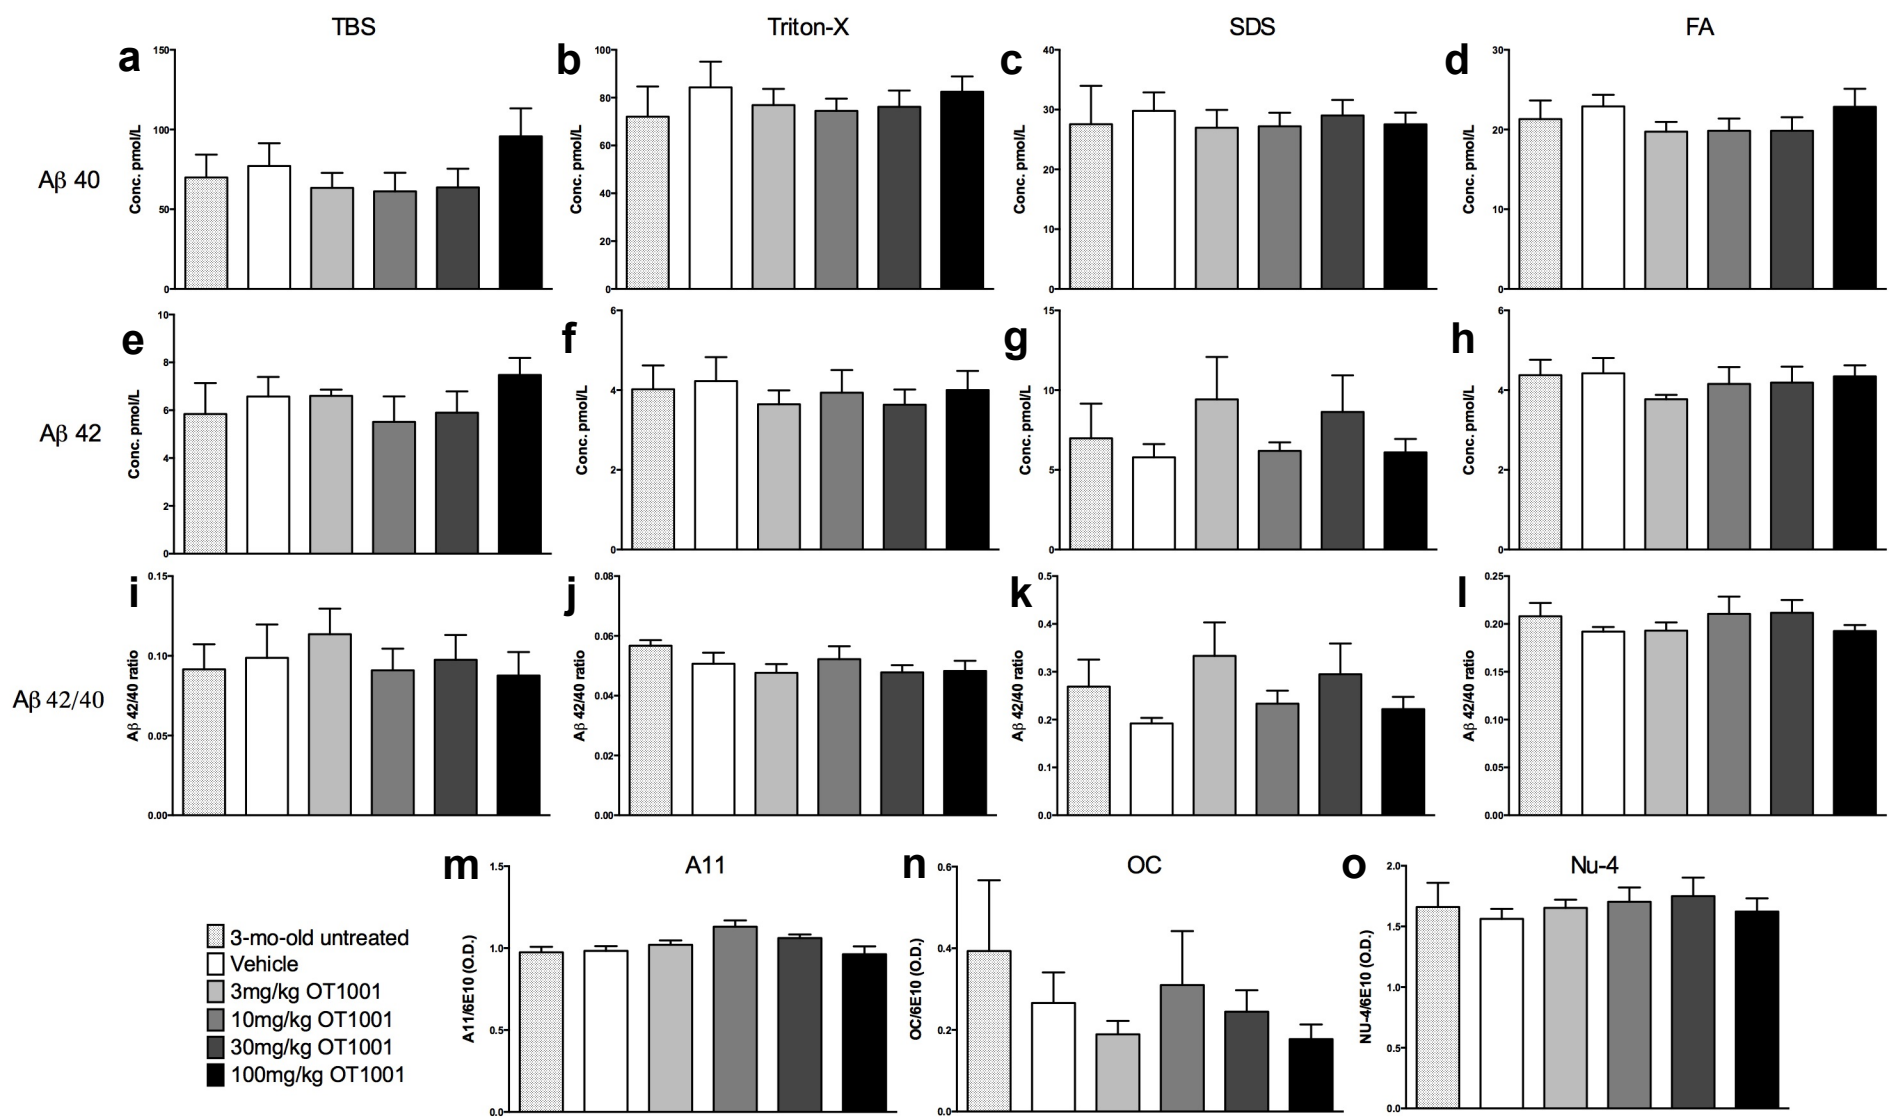

Supplement: mp2014135x4.pdf [file mp2014135x4.pdf]
